# Supplementary material for: Optimizing SARS-CoV-2 vaccination strategies in France: Results from a stochastic agent-based model
Source: Research Square preprint supplement (doi:10.21203/rs.3.rs-149457/v1), 2021-01-23
Supplement: Supplementary file 1 [file b6391032dc6b8c921d0d7c50.docx]

**SUPPLEMENTARY MATERIAL**

**eFigure 1. Estimated cumulative incidence, mortality and number of hospital admissions between January 15th, 2021 and July 1st, 2021 associated with the absence of vaccination (A), and with the vaccination of the non-immunized full adult population (B), adults under 65 years (C), adults over 45 years (D), adults over 55 years with mandatory vaccination of those over 65 years (E), adults under 35 years and over 65 years (F), adults over 65 years (G), and adults at risk of severe COVID (i.e. aged over 65 years or with medical conditions) (H).**

**
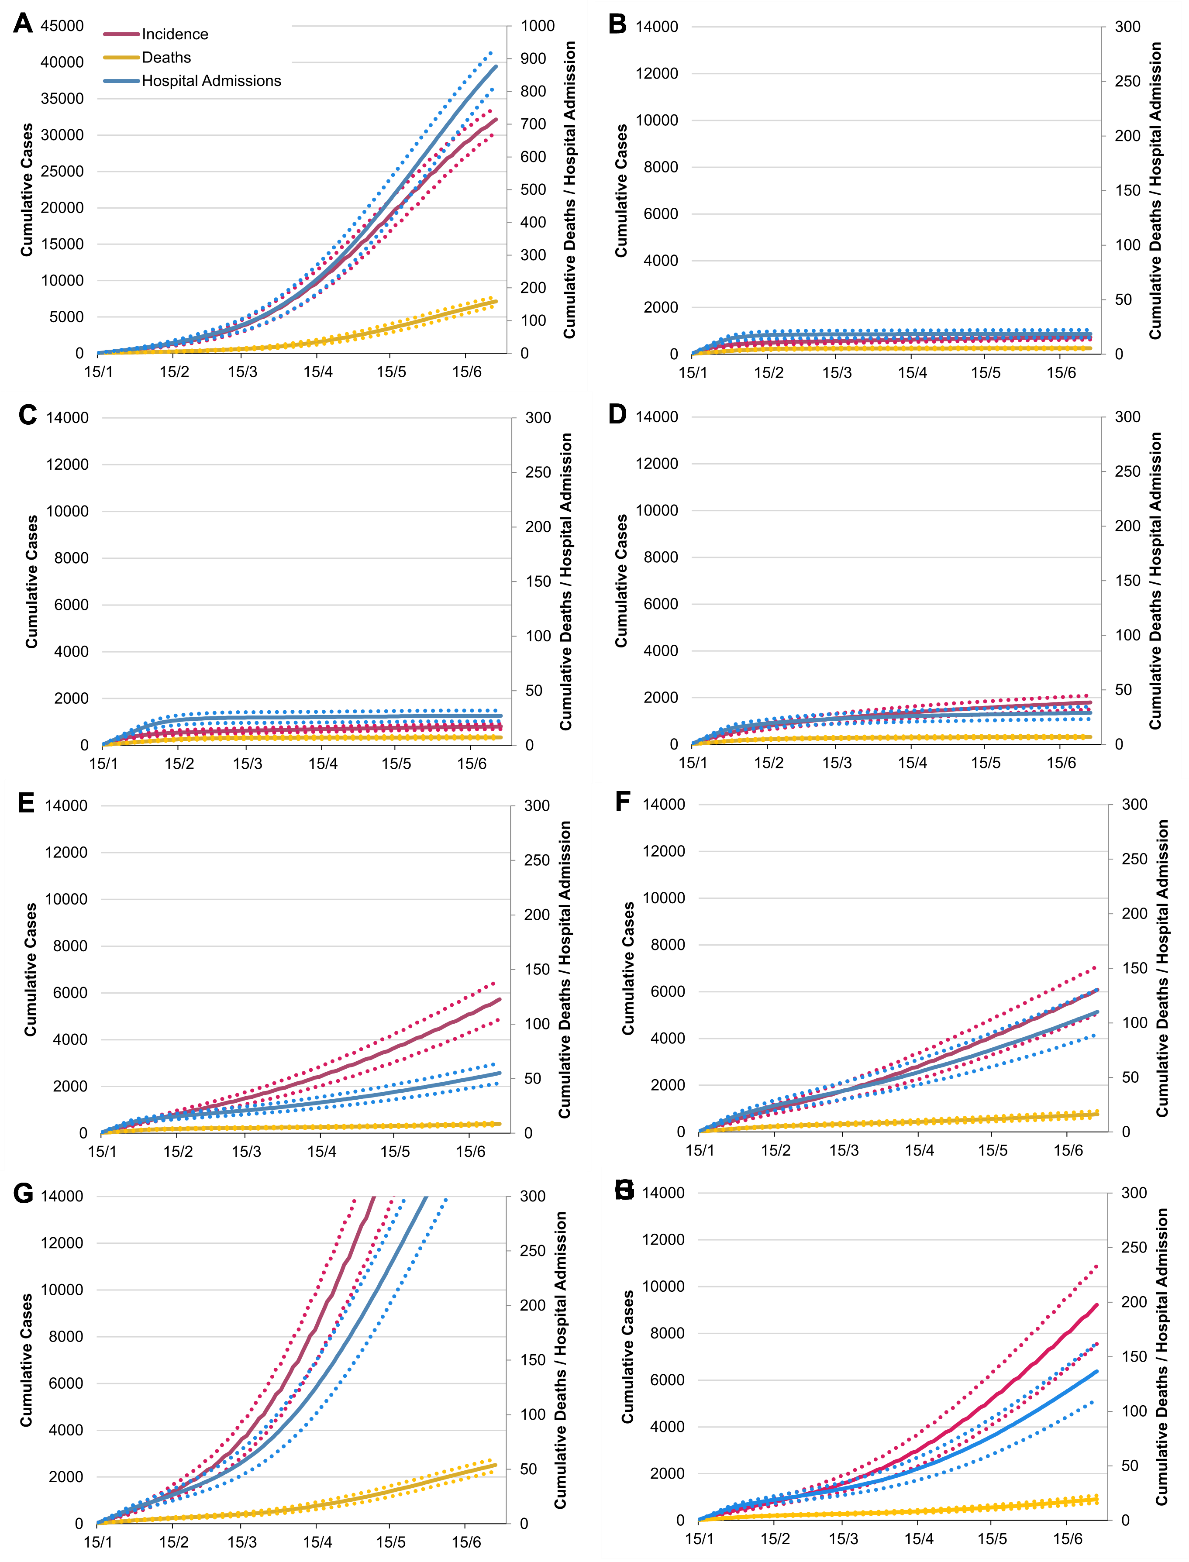
**

Note: Numbers are absolute values for the French population. The dotted lines represent the uncertainty range (95% prediction interval) stemming from the uncertainty in the parameter values.

**eFigure2. Model-predicted daily incidence in France in the scenario considering that NPIs present on December 15th would be maintained until April 15th and then discontinued after that date.** The dotted lines represent the uncertainty range (95% prediction interval) stemming from the uncertainty in the parameter values.


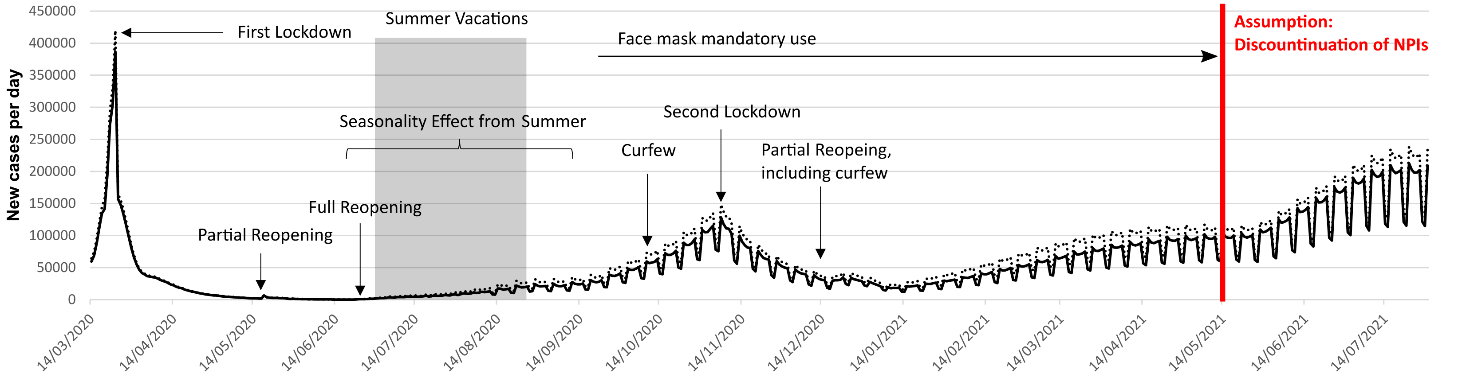


**eTable 1. Summary of main model parameters.**

| Parameters | Value | Source |
| --- | --- | --- |
| Individuals’ characteristics |  |  |
| Family structure (%) |  | Insee, 20201 |
| Singles | 37% |  |
| Couples with children | 27% |
| Couples without children | 27% |
| Singles with children | 9% |
| Age structure (categorized by 5-year age groups) |  | Insee, 20201 |
| Prevalence of conditions associated with increased risk of death from Covid-19 (i.e., obesity, diabetes, chronic cardiac diseases, and chronic respiratory diseases) | Estimates per 10-year age groups and sex | 2–7 |
| Social contacts |  |  |
| School class size (average) | 30 | Assumption |
| Proportion of small companies (<10 employees) | 18.40% | INSEE, 2018 8 |
| Number of colleagues in small companies (average) | 2 | Assumption |
| Number of colleagues in bigger companies (average) | 10 | Assumption |
| Employment rate (for people aged 20 to 65 years) | 92% | INSEE, 2020 8 |
| Shopping density (per 100,000 inhabitants) | 29.3 | APUR, 2018 9 |
| Number of shopping trips (average per week) | 1.2 | Assumption |
| Number of people met per shopping trip (average) | 5 | Assumption |
| Social network distance | 22 | 10 |
| Frequency of meeting friends (average per week) | 1 | Assumption |
| Event participations, i.e., museum, cinema, music and sport events (average per year) | 5.4 | French Ministry of Culture, 2015 11 |
| Close encounters per event participation (average) | 5 | Assumption |
| Round trips with public transport (average per week) for workers | 5 | Assumption |
| Round trips with public transport (average per week) for non-workers | 1.7 | Assumption |
| Close encounters in public transport | 3 to 5 | Assumption, with work-related trips assumed to happen at peak times with more encounters |
| International contamination (average, per week) | 1.8 | Based on imported cases observed in France initially (Santé Publique France) 7 |
| SARS-CoV-2 infection characteristics |  |  |
| Contamination risk (per min/m²) | 0.025 | Estimated through model calibration, and based on seroprevalence in May 2020 in France 12 |
| Proportion of the population infected with SARS-COV-2 in May 2020 | 4.5% |
| Proportion of asymptomatic people | 25% | London Imperial College, 2020 13 |
| Hospitalization rates | [0.1%-31.4%] | Institut Pasteur 14 |
| ICU rates (if hospitalized) | [3.4%-36.4%] | Institut Pasteur 14 |
| Mortality rates (if hospitalized) | [0.0%-42.0%] | Institut Pasteur 14 |
| Impact of comorbidities on outcomes (Hospitalization, ICU, Mortality) | Hazard ratio estimates adjusted for sex and age and other comorbidities | 15 |
| % of Reduction of contamination risk (per min/m²) during the summer (seasonality assumption) | 23% | Kissler, 2020 16 |
| Delays (days) |  |  |
| Incubation time (average, standard deviation) | 6.4 (2.3) | 17 |
| Infection onset to diagnosis (average, standard deviation) | 2.1 (2.6) | 18 |
| Infection onset to hospital admission (average, standard deviation) | 5.8 (4.2) | Institut Pasteur 14 |
| Hospital admission to recovery or transfer to rehabilitation care (average, standard deviation) (no oxygen or low-flow oxygen) | 8.0 (1.0) | DRESS 19 |
| Hospital admission to death (average, standard deviation) (no ICU admissions) | 4.0 (1.0) | DRESS 19 |
| Rehabilitation care to Recovery (average, standard deviation) (no oxygen or low-flow oxygen) | 33.0 (3.3) | DRESS 19 |
| Hospital admission to ICU (average, standard deviation) (initially low-flow oxygen) | 4.0 (1.0) | DRESS 19 |
| ICU admission to ICU discharge or death (average, standard deviation) (short stay) | 16.0 (1.6) | DRESS 19 |
| ICU admission to ICU discharge or death (average, standard deviation) (long stay) | 35.0 (3.5) | DRESS 19 |
| ICU discharge to recovery or rehabilitation care (average, standard deviation) | 4.0 (1.0) | DRESS 19 |
| Infection onset to recovery (average, standard deviation) (no hospitalization) | 20.5 (6.7) | London Imperial College 13 |
| Proportion of hospitalized patients with mild or moderate disease with low-flow oxygen | 78.2% | Assumption |
| Proportion of hospitalized patients with mild or moderate disease requiring rehabilitation care | 12.4% | DRESS 19 |
| Proportion of hospitalized patients with severe disease admitted directly to the ICU | 63.0% | DRESS 19 |
| Proportion of hospitalized patients admitted to the ICU with a long stay | 15.0% | DRESS 19 |

**Supplementary material references**

1. Insee. Population totale par sexe et âge au 1er janvier 2020, France métropolitaine. https://www.insee.fr/fr/statistiques/fichier/1892088/pop-totale-france-metro.xls.

2. Bonaldi, C. *et al.* A first national prevalence estimate of diagnosed and undiagnosed diabetes in France in 18-to 74-year-old individuals: the French Nutrition and Health Survey 2006/2007. *Diabetic medicine* **28**, 583–589 (2011).

3. Ferré, A. *et al.* Chronic bronchitis in the general population: influence of age, gender and socio-economic conditions. *Respiratory medicine* **106**, 467–471 (2012).

4. Pasquereau, A. *et al.* La consommation de tabac en France: premiers résultats du baromètre santé 2017. *Bull épidémiol hebd* **14**, 265–273 (2018).

5. Perrine, A., Lecoffre, C., Blacher, J. & Olié, V. L’hypertension artérielle en France: prévalence, traitement et contrôle en 2015 et évolution depuis 2006. *Revue de Biologie Médicale/N* **347**, (2019).

6. Herva, E. *et al.* The effect of polyvalent pneumococcal polysaccharide vaccine on nasopharyngeal and nasal carriage of Streptococcus pneumoniae. *Scandinavian journal of infectious diseases* **12**, 97–100 (1980).

7. Santé Publique France. COVID-19. Point épidémiologique hebdomadaire du 24 mars 2020. https://www.santepubliquefrance.fr/maladies-et-traumatismes/maladies-et-infections-respiratoires/infection-a-coronavirus/documents/bulletin-national/covid-19-point-epidemiologique-du-24-mars-2020.

8. Insee. *Tableaux de l’économie française*. (2018).

9. APUR. *Évolution des commerces à Paris. Inventaire 2017 et évolutions 2014- 2017*. https://www.apur.org/fr/nos-travaux/evolution-commerces-paris-inventaire-commerces-2017-evolutions-2014-2017 (2018).

10. Gilbert, E., Karahalios, K. & Sandvig, C. The network in the garden: Designing social media for rural life. *American Behavioral Scientist* **53**, 1367–1388 (2010).

11. Ministère de la Culture. *Chiffres clés.* (2018).

12. INSERM. EpiCov. https://www.epicov.fr/ (2020).

13. MCfGIDA. Imperial College London. COVID-19—report 3: transmissibility of 2019-nCoV. https://www.imperial.ac.uk/mrc-global-infectious-disease-analysis/news-wuhan-coronavirus/ (2010).

14. Salje, H. *et al.* Estimating the burden of SARS-CoV-2 in France. *Science* **369**, 208–211 (2020).

15. Williamson, E. *et al.* OpenSAFELY: factors associated with COVID-19-related hospital death in the linked electronic health records of 17 million adult NHS patients. *MedRxiv* (2020) doi:https://doi.org/10.1101/2020.05.06.20092999.

16. Kissler, S. M., Tedijanto, C., Goldstein, E., Grad, Y. H. & Lipsitch, M. Projecting the transmission dynamics of SARS-CoV-2 through the postpandemic period. *Science* **368**, 860–868 (2020).

17. Backer, J. A., Klinkenberg, D. & Wallinga, J. Incubation period of 2019 novel coronavirus (2019-nCoV) infections among travellers from Wuhan, China, 20–28 January 2020. *Eurosurveillance* **25**, 2000062 (2020).

18. Kucharski, A. J. *et al.* Early dynamics of transmission and control of COVID-19: a mathematical modelling study. *The lancet infectious diseases* (2020).

19. Courtejoie, N. & Dubost, C.-L. Parcours hospitalier des patients atteints de la Covid-19 lors de la première vague de l’épidémie. (2020).
